# Supplementary material for: PDGF-mediated mesenchymal transformation renders endothelial resistance to anti-VEGF treatment in glioblastoma
Source: PubMed Central journal article supplement (PMC6110798; doi:10.1038/s41467-018-05982-z), 2018-08-27
Supplement: 41467_2018_5982_MOESM1_ESM.pdf [file 41467_2018_5982_MOESM1_ESM.pdf]

## **Supplementary Information**

PDGF-mediated mesenchymal transformation renders endothelial resistance to anti-VEGF treatment in glioblastoma

Liu et al.

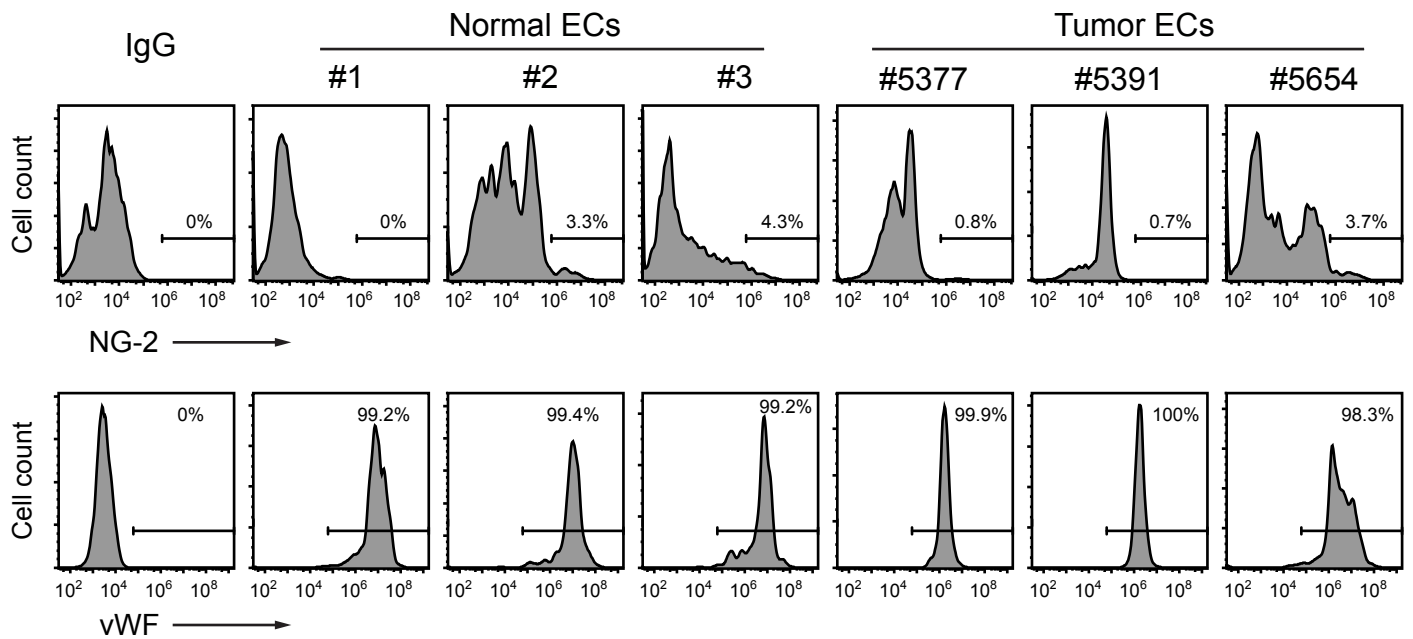

**Supplementary Figure 1. Identification of microvascular ECs isolated from normal human brains and GBM tumors.** ECs derived from normal human brains (#1 and #2 from adult brains and #3 from fetal brain) and from human GBM tumors (patients #5377, #5391, and #5654) were immunostained with anti-NG-2 or anti-vWF antibody or isotype IgG, followed by flow cytometry analysis. Representative sortings are shown.

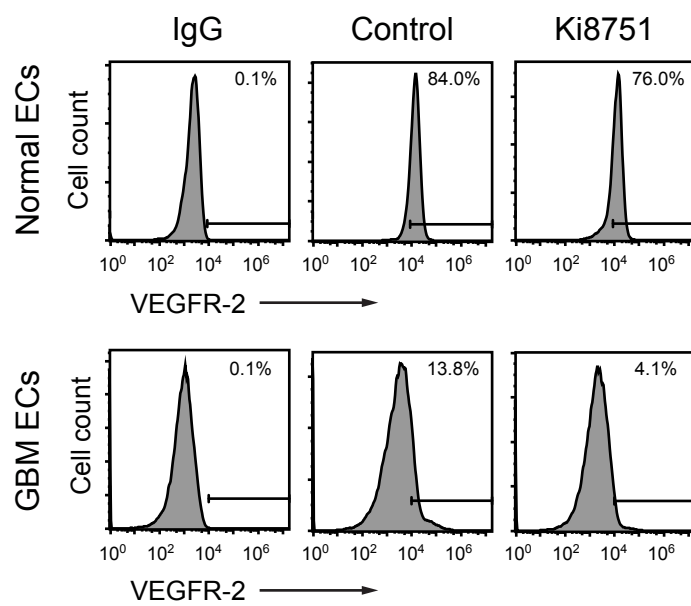

**Supplementary Figure 2. VEGFR-2 expression after Ki8751 treatment in ECs.**

ECs derived from normal human brain and from human GBM tumor (patients #5377) were treated with 1  $\mu$ M Ki8751 or control medium. Single cell suspensions were immunostained with anti-VEGFR-2 antibody or isotype IgG, followed by flow cytometry analysis. Representative sortings are shown.

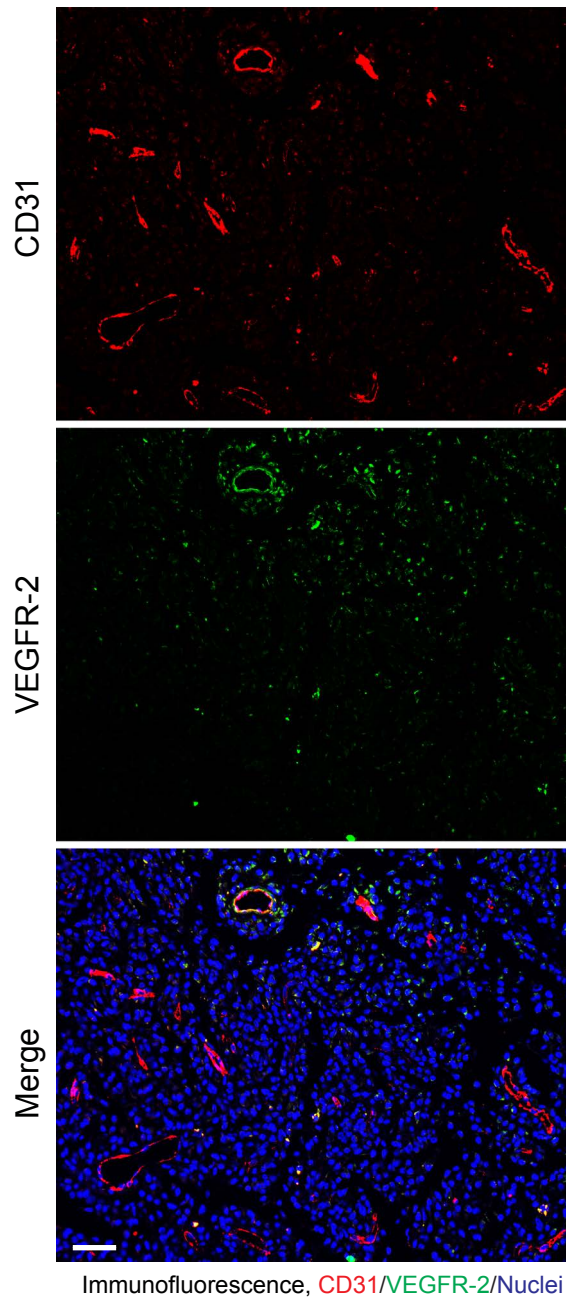

**Supplementary Figure 3. Diminished expression of VEGFR-2 in GBM-associated ECs.**

Tissue sections from surgical specimens of human patients with GBM (n = 3) were stained with anti-CD31 and anti-VEGFR-2 antibodies, followed by immunofluorescence analysis. Representative images are shown. Scale bar: 100  $\mu$ m.

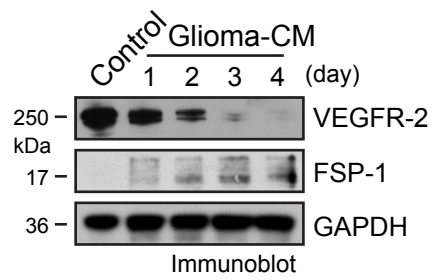

**Supplementary Figure 4. Effects of glioma-CM on Endo-MT in ECs.**

Glioma-CM was harvested from the medium of U251 human glioma cells cultured under normoxia. Human brain ECs were treated with glioma-CM or control normal medium. EC lysates were immunoblotted.

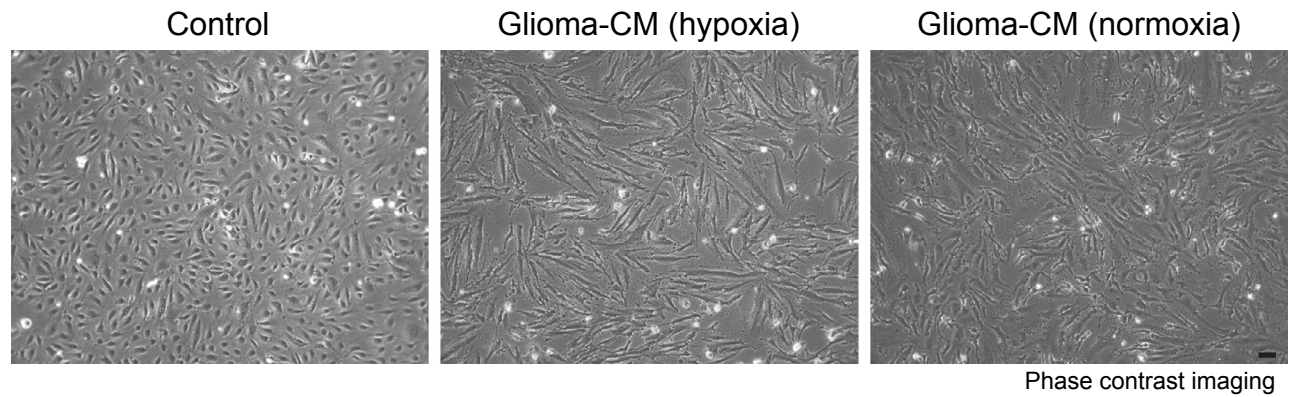

**Supplementary Figure 5. Effects of glioma-CM on EC morphology.**

Human brain ECs were treated with control normal medium or glioma-CM that was isolated from U251 human glioma cells cultured under hypoxia or normoxia. After 48 h incubation, cells were imaged. Scale bar: 100  $\mu$ m.

**a**

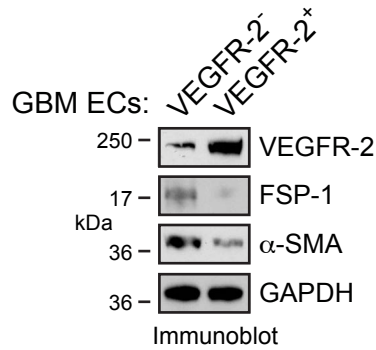

**b**

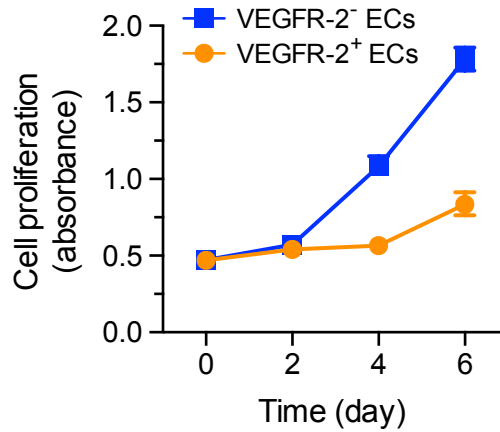

**Supplementary Figure 6. VEGFR2<sup>+</sup> and VEGFR2<sup>-</sup> GBM ECs.**

ECs were isolated from the GBM tumor of human patient #5377. Cells were incubated with anti-VEGFR-2 antibody-conjugated magnetic beads, followed by magnetic-activating cell sorting (MACS). VEGFR-2<sup>+</sup> and VEGFR-2<sup>-</sup> cells were isolated and cultured.

(a) Cell lysates were analyzed by immunoblot. (b) Cells were subjected to proliferation analysis (n = 3, mean  $\pm$  SD).

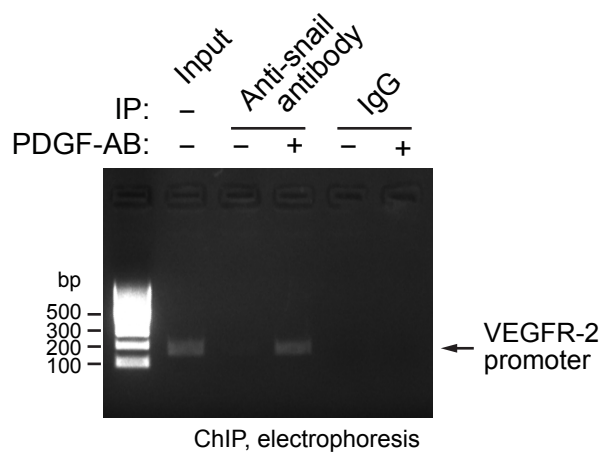

**Supplementary Figure 7. PDGF-AB induces Snail binding to VEGFR-2 promoter in ECs.**

Human brain ECs were treated with PDGF-AB or control medium for 24 h. Nuclear extracts were immunoprecipitated with anti-Snail antibody or IgG, and subjected to ChIP analysis. DNA was resolved by agarose electrophoresis, and imaged. The arrow indicates the amplified DNA in VEGFR-2 promoter.



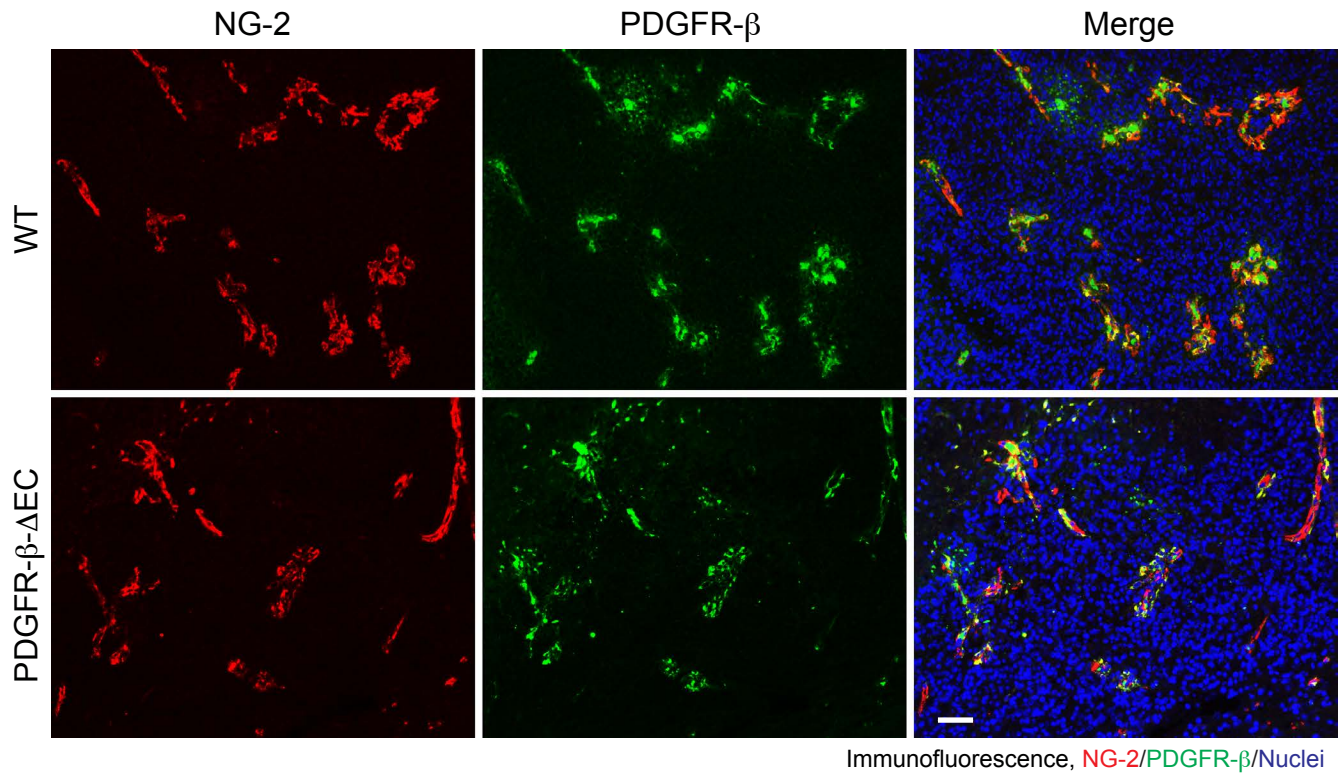

**Supplementary Figure 8. Pericyte and PDGFR- $\beta$  expression in mouse GBM tumors.**

The primary GBM was induced in *Ntv-a;Ink4a-Arf<sup>-/-</sup>;Pten<sup>-/-</sup>;LSL-Luc* donor mice by RCAS-mediated somatic gene transfer. Single-cell tumor suspension was implanted into *Pdgfrb<sup>fl/fl</sup>* (WT) or *Tie2-Cre;Pdgfrb<sup>fl/fl</sup>* (PDGFR- $\beta$ - $\Delta$ EC) recipient mice. Tumor sections were stained with anti-NG-2 and anti-PDGFR- $\beta$  antibodies, followed by immunofluorescence analysis. Representative images are shown (n = 4 mice). Scale bar: 100  $\mu$ m.

Fig. 1c

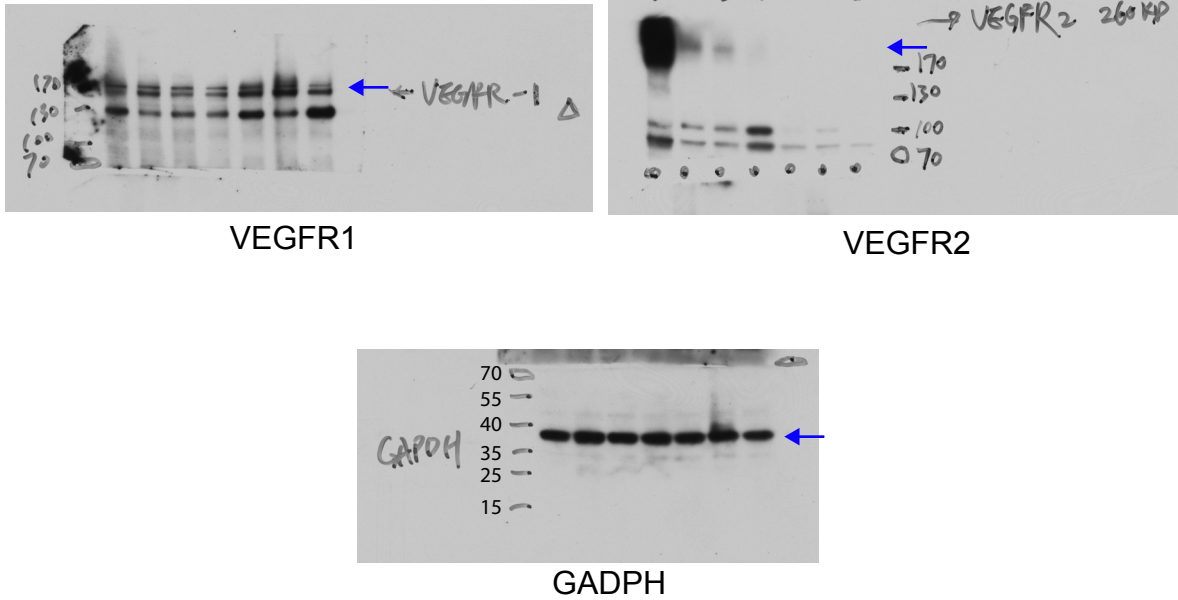

Fig. 2c

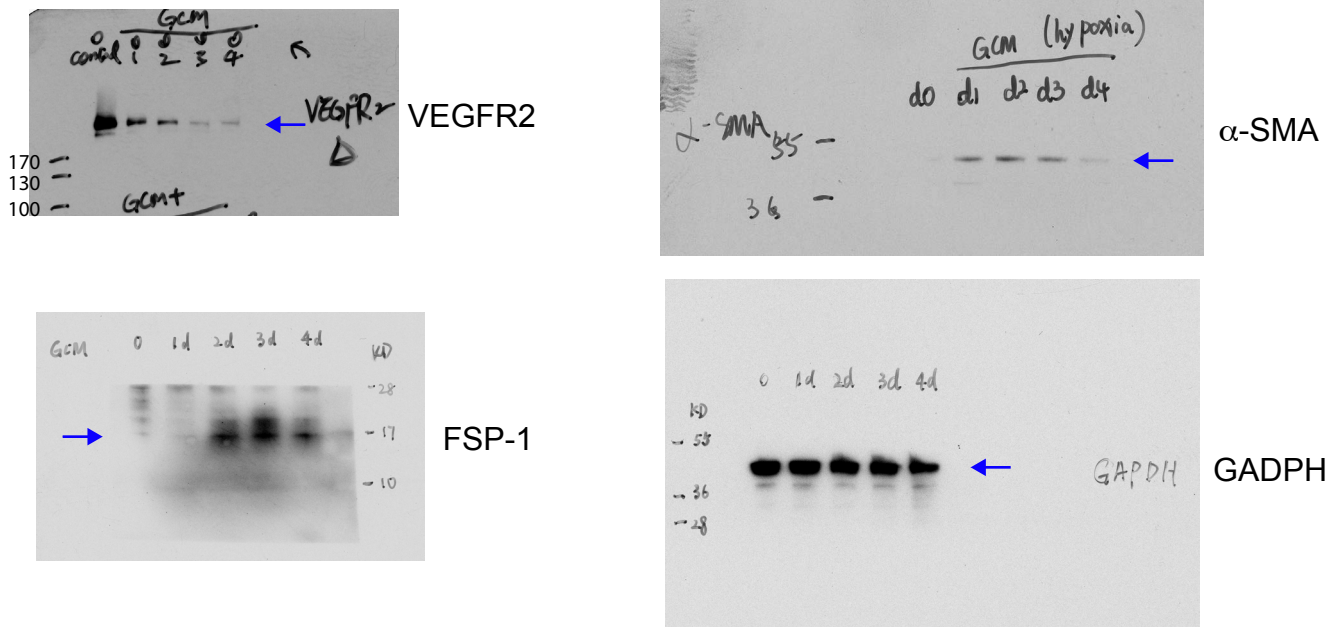

Fig. 2e

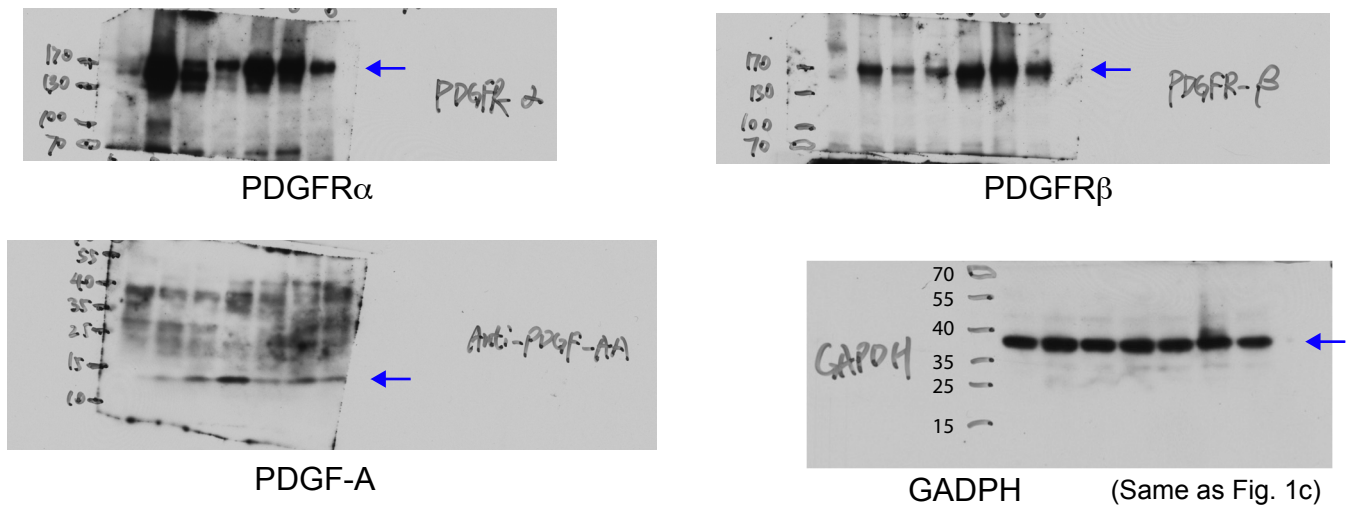

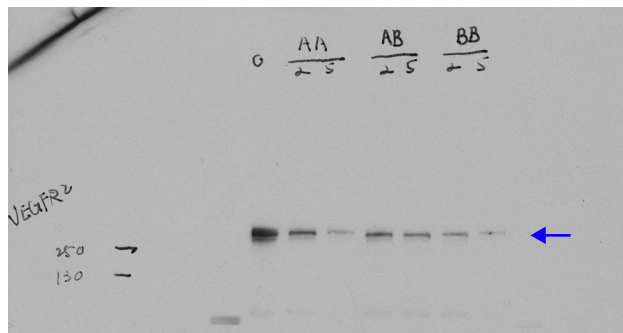

VEGFR2

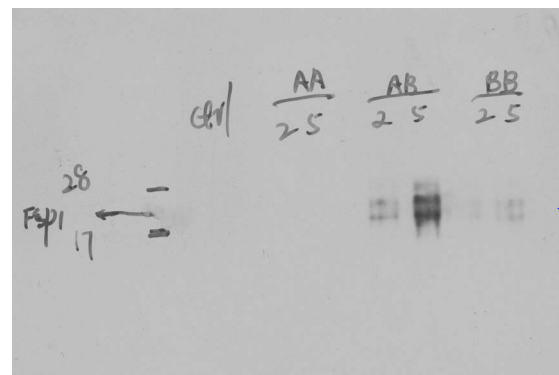

FSP-1

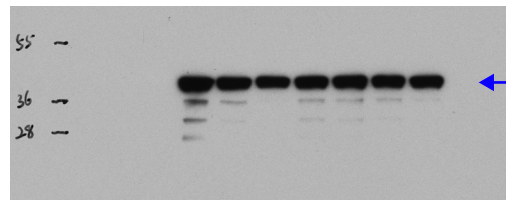

GADPH

Fig. 2f

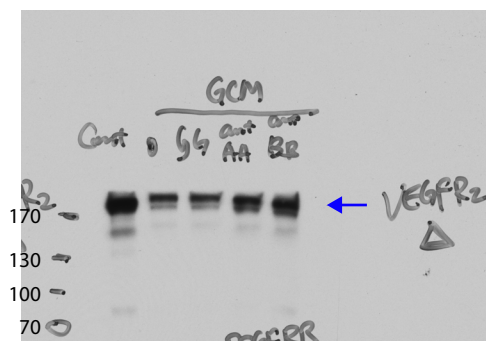

VEGFR2

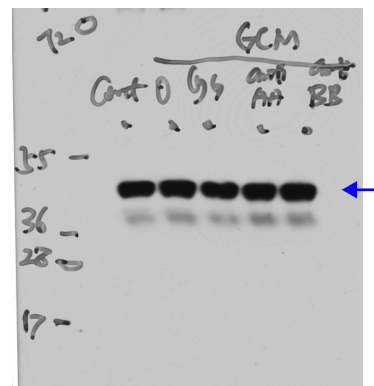

GADPH

Fig. 3a

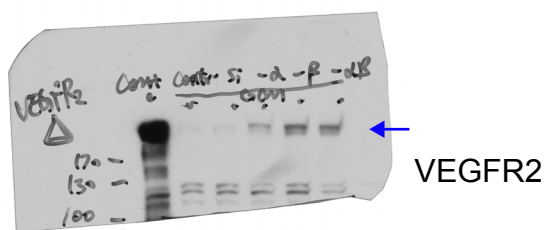

VEGFR2

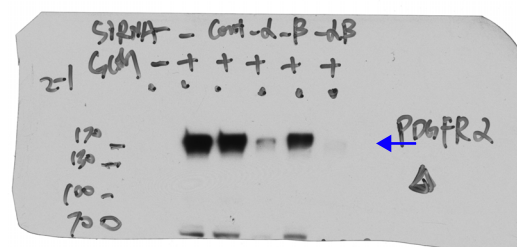

PDGFR $\alpha$

Fig. 3c

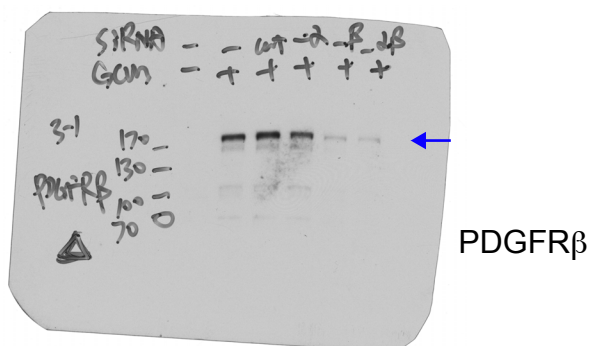

PDGFR $\beta$

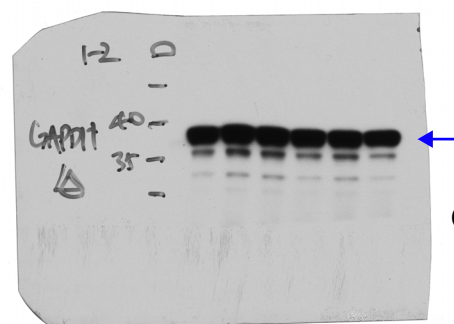

GADPH

Fig. 4b

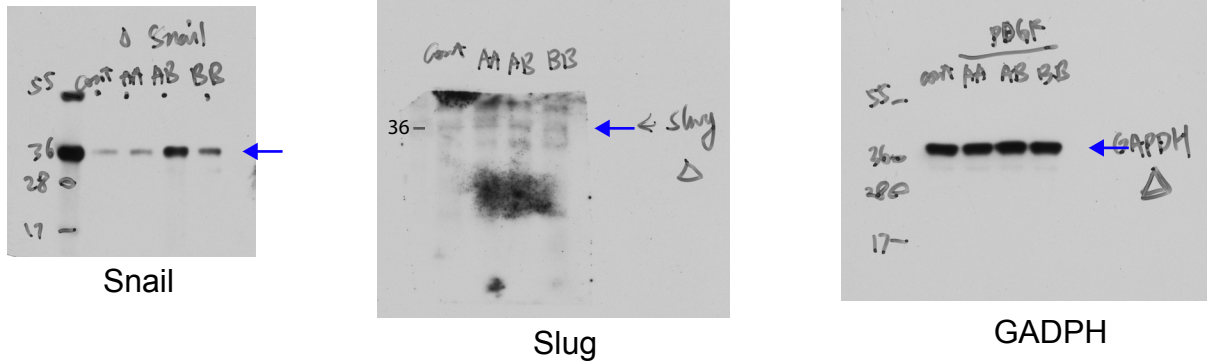

Fig. 4d

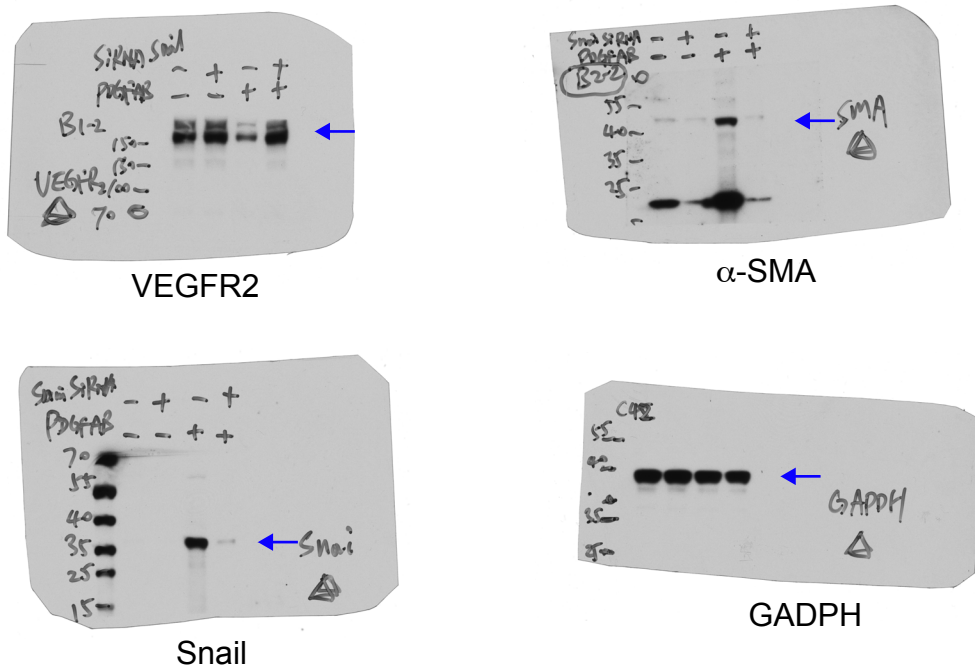

Fig. 4e

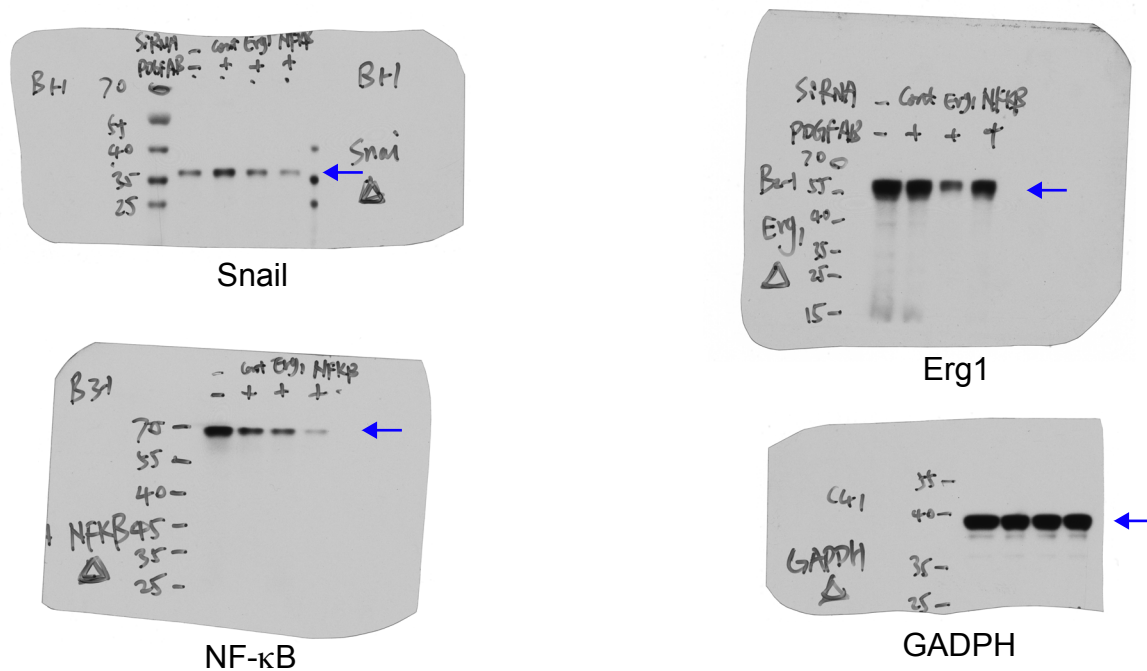

Fig. 5a

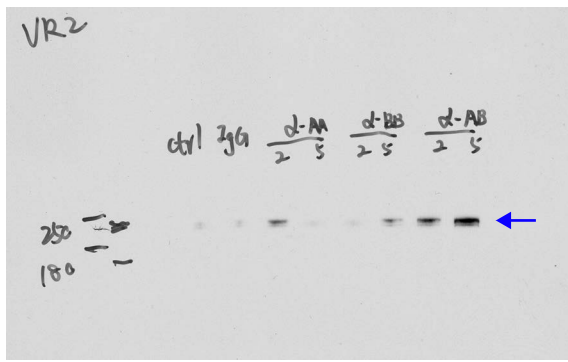

VEGFR2

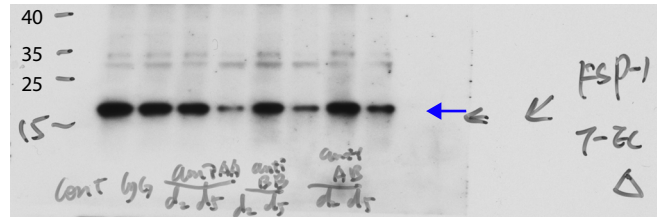

FSP-1

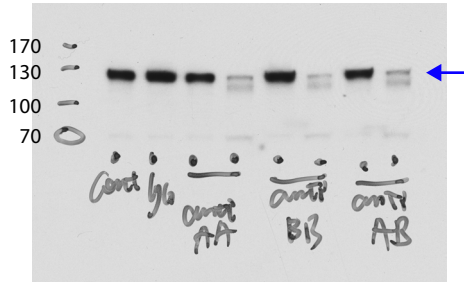

N-cadherin

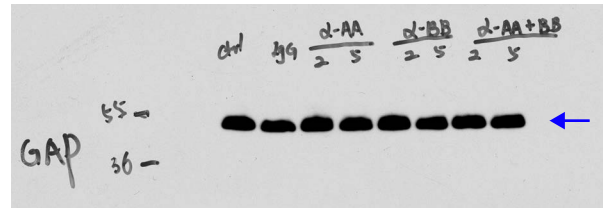

GAPDH

Fig. 5a

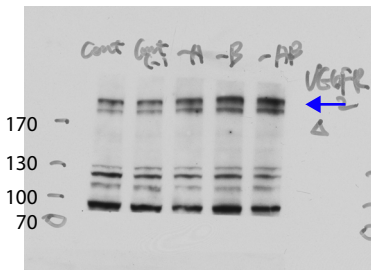

VEGFR2

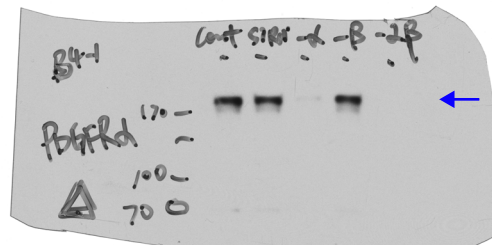

PDGFR $\alpha$

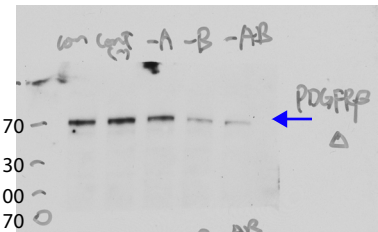

PDGFR $\beta$

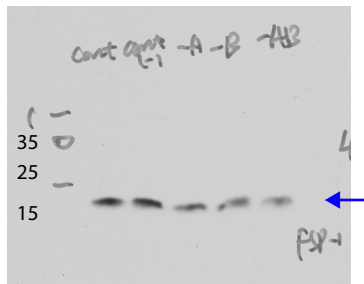

FSP-1

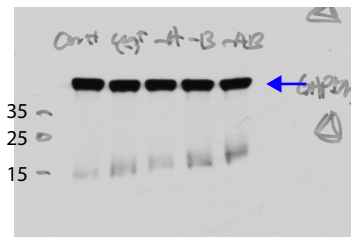

GAPDH

Fig. 7b

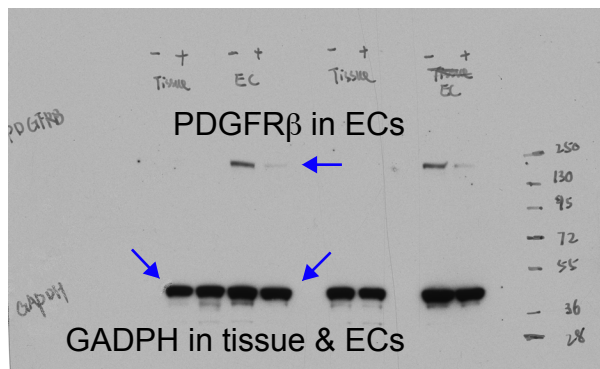

Light exposure

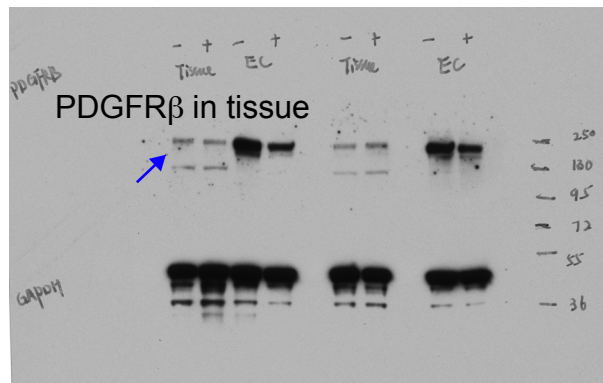

Heavy exposure

Fig. S4

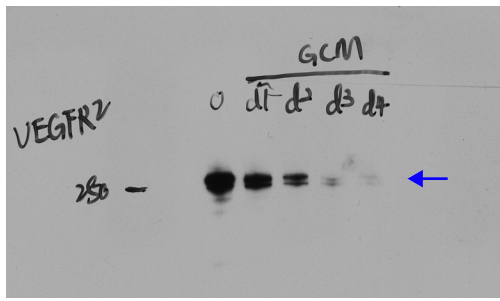

VEGFR2

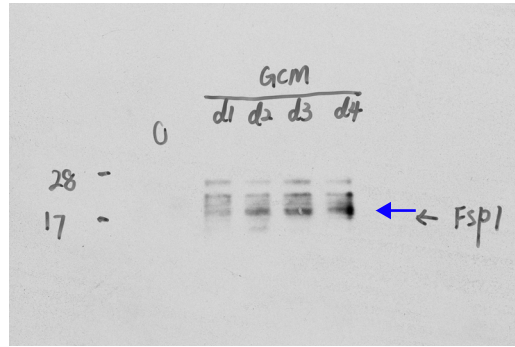

FSP-1

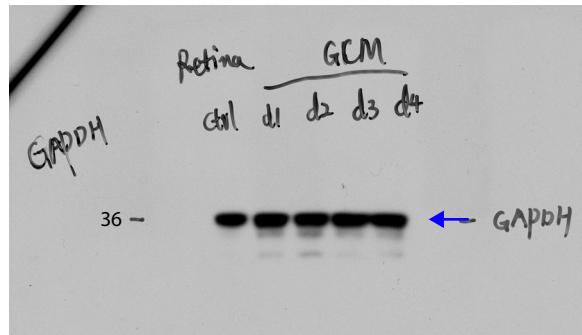

GAPDH

Fig. S6

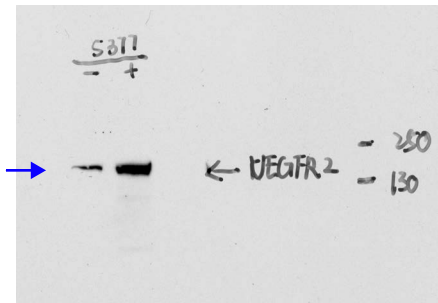

VEGFR2

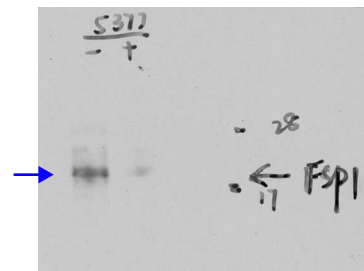

FSP-1

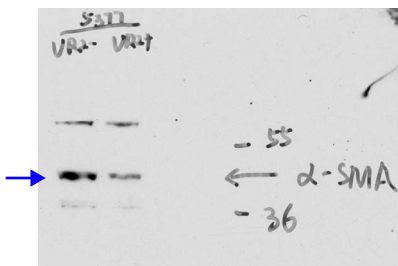

α-SMA

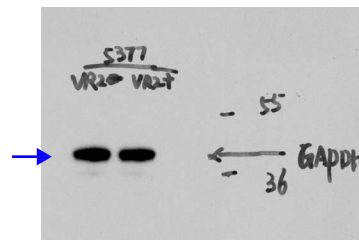

GAPDH
